# Supplementary material
Source: Springer Nature journal article supplement (https://www.springermedizin.de/resource/supplementary/12891_2011_1397_MOESM4_ESM.pdf/9508180)

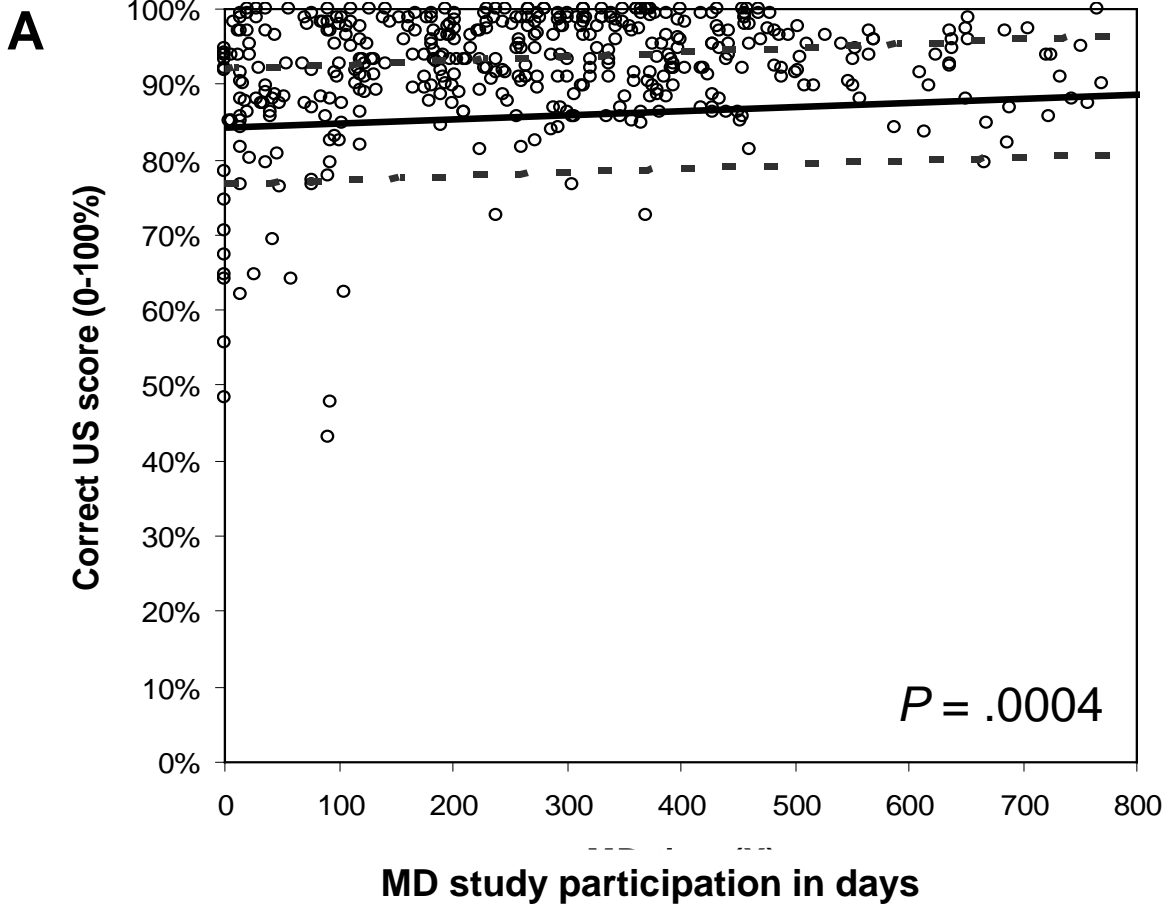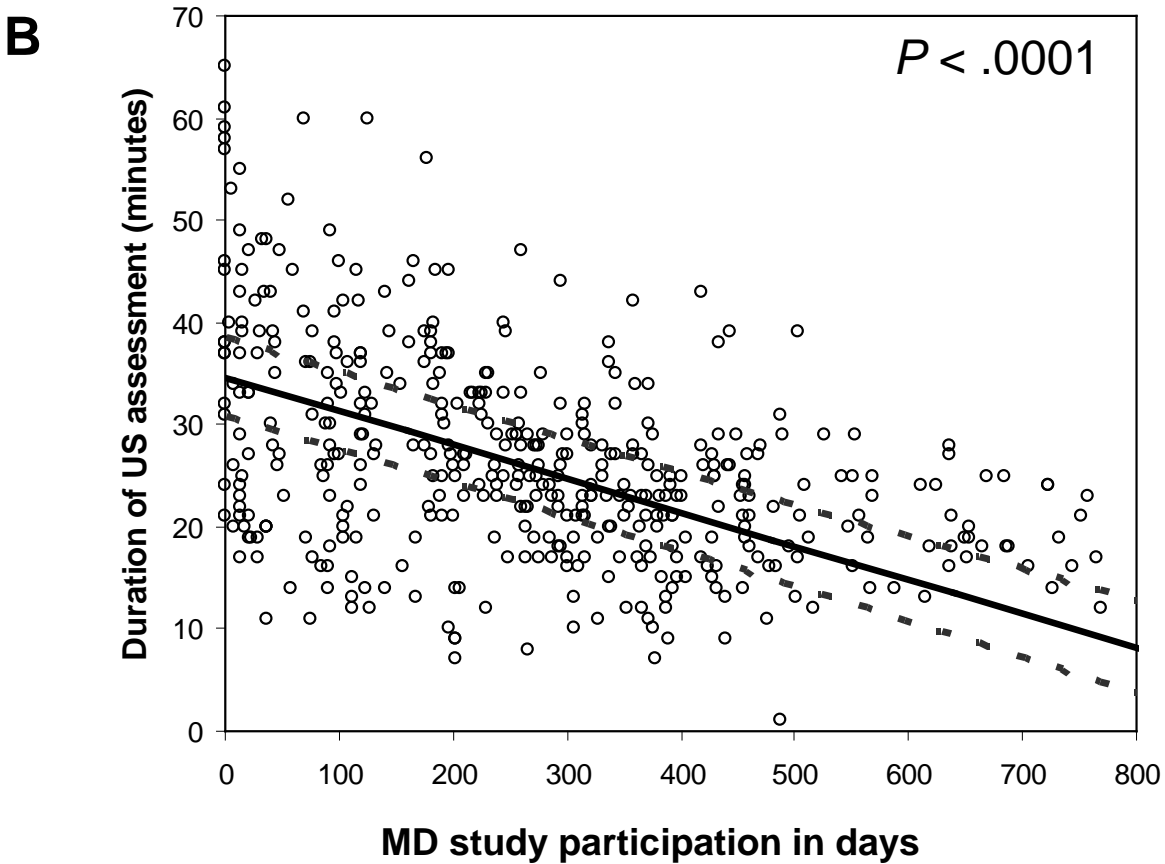

Supplement: MOESM4 [file 9508180]
